# Supplementary material for: Decision Analytics mit Heatmap-Visualisierung von mehrschrittigen Ensembledaten
Source: Springer Nature journal article supplement (doi:10.1007/s11576-014-0417-3), 2014-04-28
Supplement: 11576_2014_417_MOESM1_ESM.pdf [file 11576_2014_417_MOESM1_ESM.pdf]

# **Decision Analytics mit Heatmap Visualisierung von mehrschrittigen Ensembledaten – Eine Anwendung von Unsicherheitsmodellierung für Historical Consistent Neural Network und andere Prognosetechniken**

**Cornelius Köpp, Hans-Jörg von Mettenheim, Michael H. Breitner**

WIRTSCHAFTSINFORMATIK (2014) 56(3)

**Anhang (verfügbar online über <http://springerlink.com>)**

## Anhang A

**Tab. A-1** Heatmap Varianten

| Kern / Variante                                                                                                                   | Beschreibung                                                                                                                                                                                                                    |
|-----------------------------------------------------------------------------------------------------------------------------------|---------------------------------------------------------------------------------------------------------------------------------------------------------------------------------------------------------------------------------|
| $k_1(\delta) := 1_{\{ \delta  < \varepsilon\}}$                                                                                   | „InClassRadiusHeatmapGenerator“                                                                                                                                                                                                 |
| $k_2(\delta)$ besitzt keine triviale Darstellung, diese Variante basiert nicht auf Faltung                                        | „MeanGradientHeatmapGenerator“<br>Diese Variante nutzt den mittleren Gradienten (innerhalb des zugehörigen Bereichs jedes Heatmap-Elements) einer Funktion ähnlich einer linear interpolierten kumulativen Verteilungsfunktion. |
| $k_3(\delta) := 1_{\{\delta > 0\}}$                                                                                               | „DistributionFunctionLikeHeatmapGenerator“                                                                                                                                                                                      |
| $k_4(\delta) := k_1(\delta)$ mit $\varepsilon = (v_{\max} - v_{\min})/r/2$                                                        | „InBucketHeatmapGenerator“                                                                                                                                                                                                      |
| $k_5(\delta) := (\delta_5 + 1)^{-2}$ mit<br>$\delta_5 := (\max(\{\min\{ \delta  - (v_{\max} - v_{\min})/r/2, 1\}; 0\}) + 1)^{-2}$ | „InverseSquareBucketDistanceHeatmapGenerator“                                                                                                                                                                                   |
| $k_6(\delta) := e^{p \cdot \delta^2}$ mit $p < 0$                                                                                 | Gauss Kern                                                                                                                                                                                                                      |
| $k_7(\delta) := 1/(1 + p \cdot \delta^2)$                                                                                         |                                                                                                                                                                                                                                 |
| $k_8(\delta) := e^{p \cdot  \delta }$                                                                                             | Ersetzt $\delta^2$ durch $ \delta $ im Gauss Kern                                                                                                                                                                               |
| $k_9(\delta) := 1 -  \tanh(\delta) $                                                                                              |                                                                                                                                                                                                                                 |
| $k_{10}(\delta) := k_6(\delta)$ mit Lookup-Table                                                                                  | Gauss Kern mit Lookup-Table                                                                                                                                                                                                     |
| $k_{11}(\delta) := k_{10}(\delta)$ mit einfacher, statt doppelter Fließkommagenauigkeit                                           | Gauss Kern mit Lookup-Table und einfacher Fließkommagenauigkeit                                                                                                                                                                 |
| $k_{12}(\delta) := (2 \cdot \pi)^{-1/2} \cdot e^{-\delta^2/2}$                                                                    | KDE Gauss                                                                                                                                                                                                                       |
| $k_{13}(\delta) := 1/\pi \cdot 1/(1 - \delta^2)$                                                                                  | KDE Cauchy                                                                                                                                                                                                                      |
| $k_{14}(\delta) := 1/2 \cdot e^{- \delta }$                                                                                       | KDE Picard                                                                                                                                                                                                                      |
| $k_{15}(\delta) := 3/4 \cdot \max(\{1 - \delta^2, 0\})$                                                                           | KDE Epanechnikov                                                                                                                                                                                                                |

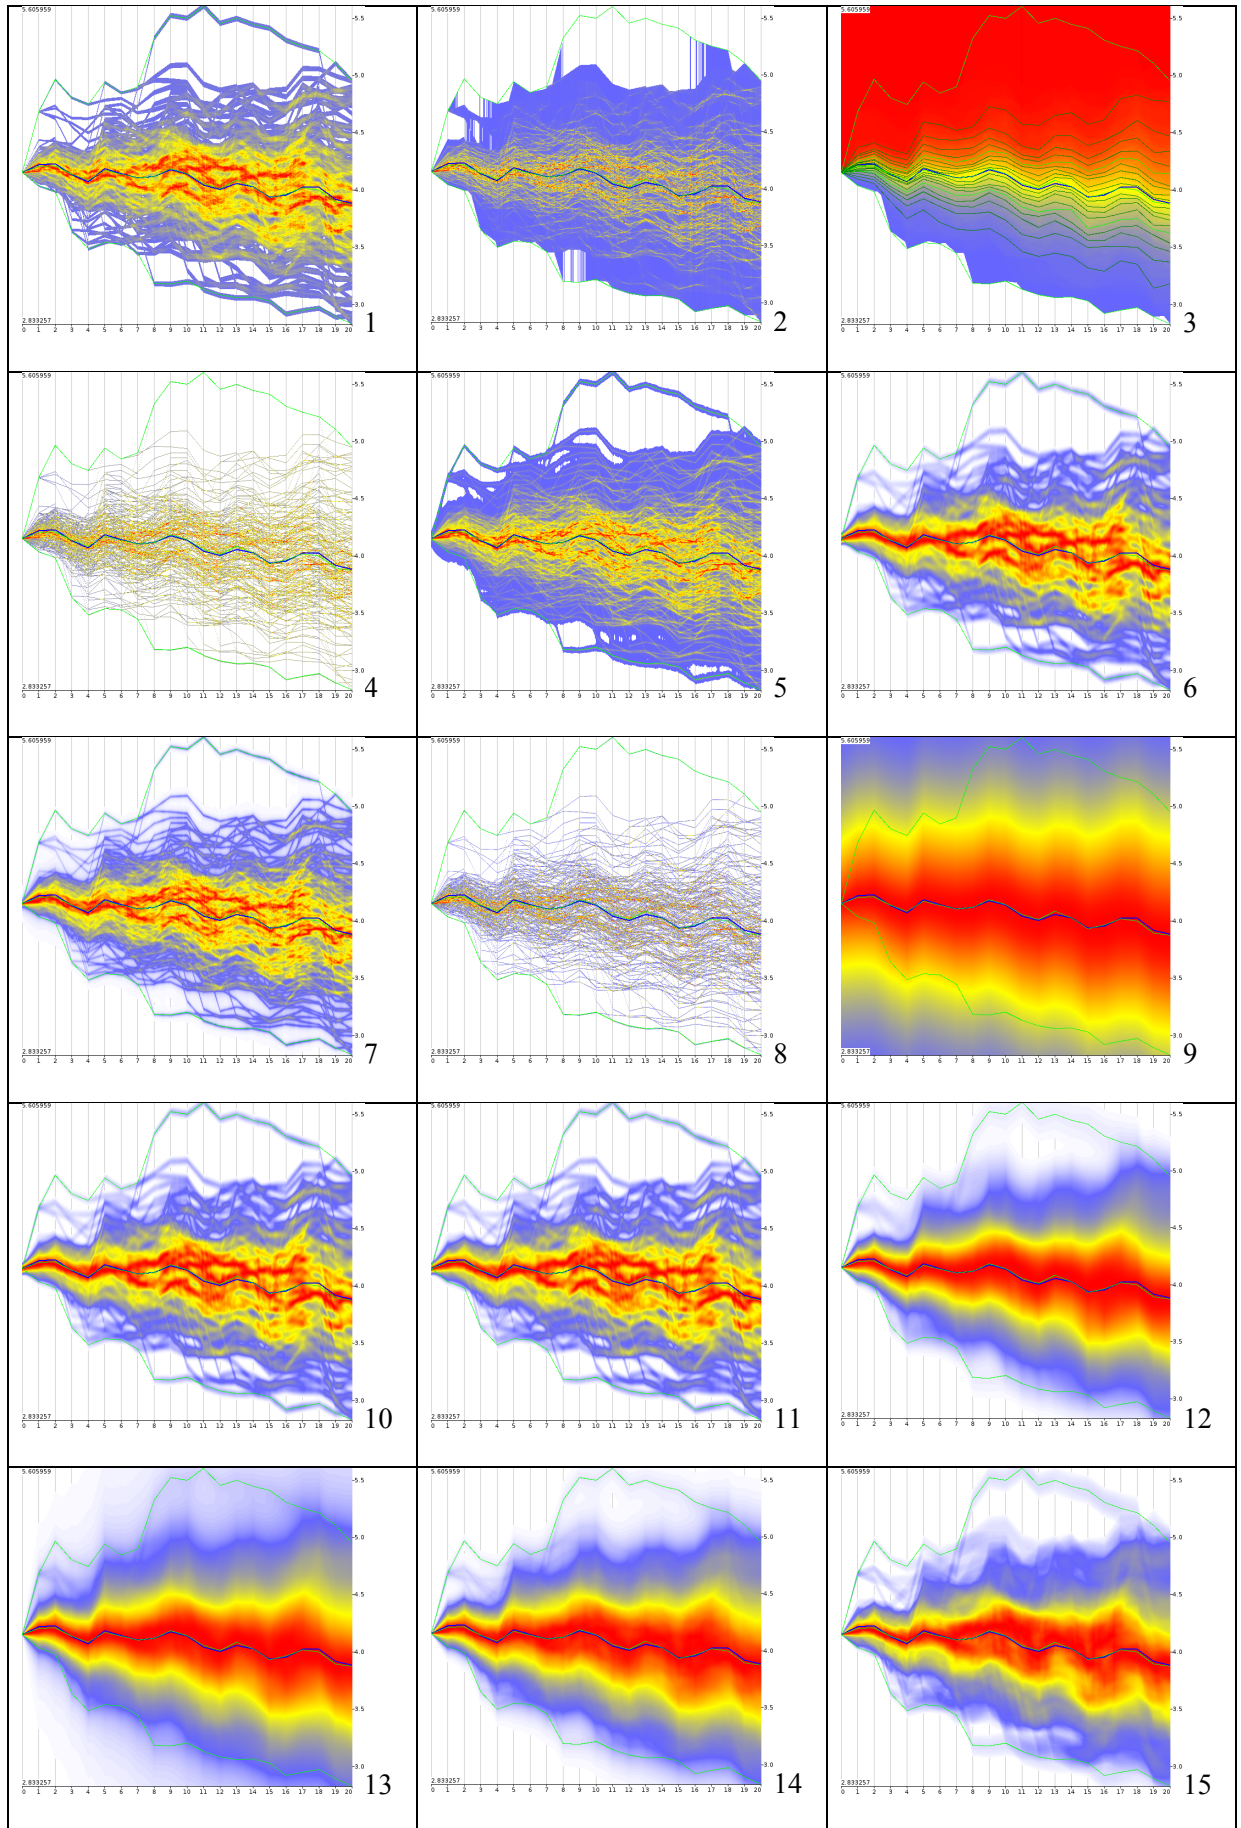

**Abb. A-1** Implementierte Heatmap-Varianten (Standardparameter, Normiert)
